# Supplementary material
Source: publisher figshare collection journal article supplement (https://karger.figshare.com/articles/dataset/_/3695943)
Supplement: Supplementary file 1 [file 1]

**Supplementary able 1 (Table S1)** for Rando et al., : G-CSF Ameliorates Skeletal Muscle Dysfunction In ALS Mice and Improves Proliferation of SOD1-G93A Myoblasts n In Vitro. Published in *Neurodegenerative diseases*.

Table 1. Taqman probes used

| <b>Gen Symbol</b> | <b>Part Number</b> |
|-------------------|--------------------|
| <b>Ankrd1</b>     | Mm00496512_m1      |
| <b>Chrma1</b>     | Mm00431629_m1      |
| <b>Col19a1</b>    | Mm00483576_m1      |
| <b>Csf3r</b>      | Mm00432735_m1      |
| <b>CXCR4</b>      | Mm01996749_s1      |
| <b>Impa1</b>      | Mm00497770_m1      |
| <b>Mef2c</b>      | Mm00600423_m1      |
| <b>Mt2</b>        | Mm00809556_s1      |
| <b>Myf5</b>       | Mm00435125_m1      |
| <b>Myod1</b>      | Mm00440387_m1      |
| <b>Myog</b>       | Mm00446194_m1      |
| <b>Nnt</b>        | Mm00435154_m1      |
| <b>Pax7</b>       | Mm00834079_m1      |
| <b>Rrad</b>       | Mm00451053_m1      |
| <b>Rtn4</b>       | Mm00445861_m1      |
| <b>b-actin</b>    | 4352932E           |
| <b>GAPDH</b>      | 4352933E           |
